RESEARCH ARTICLE

# Linear and nonlinear causal relationship between energy consumption and economic growth in China: New evidence based on wavelet analysis

Junsheng Ha<sup>☉</sup>, Pei-Pei Tan<sup>☉</sup>, Kim-Leng Goh<sup>☉\*</sup>

Department of Applied Statistics, Faculty of Economics & Administration, University of Malaya, Kuala Lumpur, Malaysia

☉ These authors contributed equally to this work.

\* [klgoh@um.edu.my](mailto:klgoh@um.edu.my)

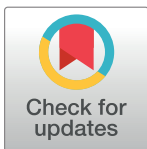

**OPEN ACCESS**

**Citation:** Ha J, Tan P-P, Goh K-L (2018) Linear and nonlinear causal relationship between energy consumption and economic growth in China: New evidence based on wavelet analysis. PLoS ONE 13 (5): e0197785. <https://doi.org/10.1371/journal.pone.0197785>

**Editor:** Jacint Balaguer, Universitat Jaume I, SPAIN

**Received:** February 28, 2018

**Accepted:** May 8, 2018

**Published:** May 21, 2018

**Copyright:** © 2018 Ha et al. This is an open access article distributed under the terms of the [Creative Commons Attribution License](https://creativecommons.org/licenses/by/4.0/), which permits unrestricted use, distribution, and reproduction in any medium, provided the original author and source are credited.

**Data Availability Statement:** All relevant data are contained within the Supporting Information files.

**Funding:** The first author (Junsheng Ha) receives a scholarship from University of Malaya to pursue his PhD. This paper reports some of his research findings. The funder had no role in study design, data collection and analysis, decision to publish, or preparation of the manuscript.

**Competing interests:** The authors have declared that no competing interests exist.

## Abstract

The energy-growth nexus has important policy implications for economic development. The results from many past studies that investigated the causality direction of this nexus can lead to misleading policy guidance. Using data on China from 1953 to 2013, this study shows that an application of causality test on the time series of energy consumption and national output has masked a lot of information. The Toda-Yamamoto test with bootstrapped critical values and the newly proposed non-linear causality test reveal no causal relationship. However, a further application of these tests using series in different time-frequency domain obtained from wavelet decomposition indicates that while energy consumption Granger causes economic growth in the short run, the reverse is true in the medium term. A bidirectional causal relationship is found for the long run. This approach has proven to be superior in unveiling information on the energy-growth nexus that are useful for policy planning over different time horizons.

## Introduction

China is now the fastest-growing economy and has ascended to be the second largest economy in the world [1], with a GDP (Gross Domestic Product) of 8.358 trillion U.S. dollars in 2012 [2]. China's economic reforms implemented since 1978 have resulted in growth that has reached the highest rates ever. To sustain its fast economic development, the government has injected a large amount of spending, especially in energy-intensive sectors. This has supported the industrial revolutions that took place in China. In 2011, China has overtaken U.S. as the world leading industrial production country with the sector producing a total output of \$2.9 trillion, compared to U.S.'s output of \$2.4 trillion [3]. At the same time, China has also surpassed U.S. to become the largest energy consumer and producer in the world [4]. However, its rapid economic expansion has also resulted in high environment costs, such as polluted waterways, degraded ecosystem and deforestation along with increased demand for energy consumption.

Due to its large population, the GDP per capita (GPC) of China in 2012 ranked 77<sup>th</sup> in the world, compared to the 11<sup>th</sup> position of U.S. [5]. With a low GPC and a large and increasing population size, China government needed a much longer time to meet its economic target, which leaves little room to slow down economic development. Although energy consumption per capita in China has been increasing at a slower rate than GPC throughout the past decades as indicated in Fig 1, the large amount of total energy consumption has caused China to become the world’s biggest emitter of greenhouse gases (GHGs), which was reported by The New York Times [6]. This has put China under international pressure to be more responsible towards the environment in reducing GHGs emission. The solution seems to be to reduce energy consumption. This has put China in a dilemma: if energy consumption is necessary for sustaining economic growth, then the adoption of an energy conservation policy will hamper growth. Therefore, an accurate interactive nexus between economic growth and energy consumption is useful for designing prudent energy policies that can help the country meet its economic targets while dealing with the environmental issues.

If economic growth leads to a higher level of energy consumption as stipulated in the conservation hypothesis (see, for example, Kraft and Kraft [7] and Abosedra and Baghestani [8]), then the energy conservation policy can be implemented since it will have little or no negative impact on the economic growth. However, if the growth hypothesis is true, more energy consumption is required to drive economic growth(see Stern [9] and Zarnikau [10]). In this case, the energy conservation policy is expected to hamper economic growth. Hence alternative energy policy needs to be designed.

The existing energy economy literature reports rather contradicting results on the energy-growth nexus in China. By conducting a thorough review on the studies of China energy economy, Ma, Oxley [11] concluded that the possible reasons for the mixed findings include

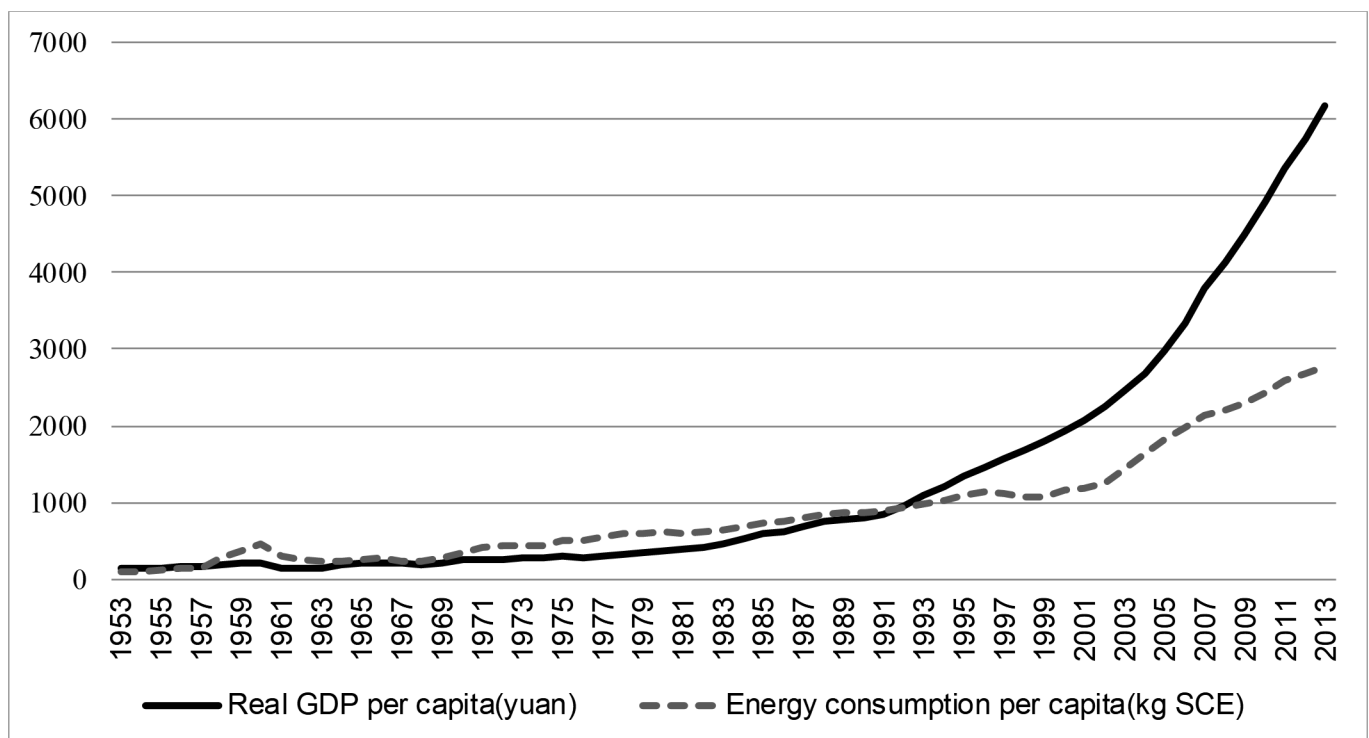

Fig 1. Energy consumption per capita and real GDP per capita (1953–2011) of China. “SCE” stands for standard coal equivalent.

<https://doi.org/10.1371/journal.pone.0197785.g001>

**Table 1. Selected literature and findings on energy-growth nexus in China.**

| Authors              | Period                 | Methodology                           | Causality relationship                                                                                                                                 |
|----------------------|------------------------|---------------------------------------|--------------------------------------------------------------------------------------------------------------------------------------------------------|
| Shiu and Lam [12]    | 1971–2000              | Bivariate model (ECM)                 | Energy (electricity)→GDP in both short and long run                                                                                                    |
| Soytas and Sari [13] | 1971–2002              | Multivariate model (T-Y)              | Energy---GDP (no cointegration)                                                                                                                        |
| Zou and Chau [14]    | 1953–2002              | Bivariate model (ECM)                 | <ul style="list-style-type: none"> <li>• Energy (oil)→GDP in the short run;</li> <li>• Energy (oil)↔GDP in the long run</li> </ul>                     |
| Chen, Kuo [15]       | 1971–2001              | Bivariate model (ECM)                 | GDP---Energy (electricity)                                                                                                                             |
| Yuan, Zhao [16]      | 1978–2004              | Bivariate model (ECM)                 | Energy (electricity)→GDP in both short and long run                                                                                                    |
| Zhang and Cheng [17] | 1960–2007              | Multivariate model (T-Y)              | GDP→Energy in the long run                                                                                                                             |
| Wang, Wang [18]      | 1972–2006              | Multivariate (ARDL)                   | Energy→GDP in both long and short run                                                                                                                  |
| Yalta and Cakar [19] | 1971–2007              | Meboot with bootstrap                 | Energy---GDP                                                                                                                                           |
| Zhang and Yang [20]  | 1978–2009              | Multivariate (T-Y)                    | Energy↔GDP in the long run                                                                                                                             |
| Bloch, Rafiq [21]    | 1977–2013<br>1965–2011 | Multivariate (ARDL and VECM)          | In the long run:<br>Energy↔GDP; Energy↔Coal; Energy↔Oil; Energy↔Renewable Energy                                                                       |
| Ouyang and Li [22]   | 1996Q1–2015Q4          | Multivariate (GMM panel VAR approach) | <ul style="list-style-type: none"> <li>• For Full sample, Central and Eastern Regions: Energy→GDP</li> <li>• For Western region: Energy↔GDP</li> </ul> |

“→” stands for “unidirectional Granger causality” from the left to the right hand-side variable, “---” stands for “no Granger causality” and “↔” stands for “bidirectional Granger causality”. ECM is error correction model, VECM is vector error correction model. T-Y is Toda-Yamamoto, and ARDL is auto-regressive distributed lag model. GMM is Generalized Method of Moments. VAR is Vector Autoregressive.

<https://doi.org/10.1371/journal.pone.0197785.t001>

differences in the methods used, study periods, data sources, and coverage of independent variables. Table 1 summarizes the recent studies and their findings on China energy economy in addition to the literature reported in Ma, Oxley [11].

From Table 1 above and the literature reviewed in Ma, Oxley [11], there are no consistent findings in the studies on energy-economy growth nexus in China. Similarly, at the international level, the findings on energy-growth nexus are also not consistent as presented in Table 2. Mixed results have been reported for different countries. In order to find more reliable and conclusive results, Karanfil [40] advised to look for new research direction from a new perspective or by adopting new techniques. He was of the view that applications of the same traditional techniques on different data sets or time periods will only add more confusion to the literature. This was supported by Payne [41] and Ozturk [42], who reviewed the empirical studies conducted in the past three decades. They concluded similarly that new approaches and new methods should be applied to study the energy-growth nexus. In addition, Yalta and Cakar [19] suggested that future studies should adopt the “state of the art econometric methods” and to be “more focused and detailed” in identifying reliable information on the energy-growth nexus with robust test results.

In line with these suggestions, this study differs from the existing literature in at least two ways. First, this study adopts time-frequency domain analysis—wavelet analysis, to examine the potential multi-scale causality relationship between energy consumption and economic growth in China, which is neglected in the literature. Granger [43, 44] suggested that rather than testing the causality over a single period, a more meaningful causality test should be conducted across different periods using a spectral-density approach. In conjunction with this, Yuan, Zhao [16] decomposed the time series they used to capture the relationship between the cyclical components of electricity consumption and economic growth by using Hodrick-Prescott (HP) filtering approach. They found cointegration between the trend components and the cyclical components. However, the HP filtering method was criticized by Harvey and Jaeger [45], Cogley and Nason [46], Baxter and King [47], McCallum [48] and others. The

**Table 2. Selected recent literatures and their findings on energy-growth nexus in various countries.**

| Authors                    | Period                             | Country                         | Causality relationship                                                                                                                                                                                                                                                                                                                                                                                                                                                                                                               |
|----------------------------|------------------------------------|---------------------------------|--------------------------------------------------------------------------------------------------------------------------------------------------------------------------------------------------------------------------------------------------------------------------------------------------------------------------------------------------------------------------------------------------------------------------------------------------------------------------------------------------------------------------------------|
| Esseghir and Khouni [23]   | 1980–2010                          | Mediterranean                   | Energy↔GDP                                                                                                                                                                                                                                                                                                                                                                                                                                                                                                                           |
| Salahuddin and Gow [24]    | 1980–2012                          | GCC                             | GDP→Energy                                                                                                                                                                                                                                                                                                                                                                                                                                                                                                                           |
| Iyke [25]                  | 1971–2011                          | Nigeria                         | Energy (electricity)→GDP in both short and long run                                                                                                                                                                                                                                                                                                                                                                                                                                                                                  |
| Bastola and Sapkota [26]   | 1980–2011                          | Nepal                           | GDP→Energy                                                                                                                                                                                                                                                                                                                                                                                                                                                                                                                           |
| Rahman, Ha [27]            | 1971–2012                          | Malaysia                        | Energy→GDP                                                                                                                                                                                                                                                                                                                                                                                                                                                                                                                           |
| Naser [28]                 | 1965–2010                          | 4 countries                     | <ul style="list-style-type: none"> <li>• Energy(oil)↔GDP for Russia, China and South Korea:</li> <li>• Energy(Nuclear)↔GDP for India</li> </ul>                                                                                                                                                                                                                                                                                                                                                                                      |
| Balaguer and Ripollés [29] | 1900–2008                          | Spain                           | <ul style="list-style-type: none"> <li>• Preceding the development policy: GDP→Energy</li> <li>• After the development policy: Energy→GDP</li> </ul>                                                                                                                                                                                                                                                                                                                                                                                 |
| Chiou-Wei, Zhu [30]        | 1965–2010                          | 5 countries                     | <ul style="list-style-type: none"> <li>• Energy↔GDP for Philippines</li> <li>• GDP→Energy for Singapore</li> <li>• GDP--Energy for other countries</li> </ul>                                                                                                                                                                                                                                                                                                                                                                        |
| Destek [31]                | 1991–2013                          | 26 countries                    | <ul style="list-style-type: none"> <li>• For panel: Energy (gas)↔GDP in short run; Energy(gas)↔GDP in long run</li> <li>• For Austria, Belgium, France, Japan, Korea, New Zealand, Norway, Turkey, and the Unites States: Energy(gas)→GDP</li> <li>• For Australia, Canada, Denmark, Ireland, Luxembourg, Netherlands and Spain: GDP→Energy (gas)</li> <li>• For Finland, Italy, Poland, Sweden, Switzerland and the United Kingdom: GDP↔Energy (gas)</li> <li>• For Chile, Germany, Greece and Mexico: GDP--Energy (gas)</li> </ul> |
| Fang and Chang [32]        | 1970–2011                          | 16 countries                    | <ul style="list-style-type: none"> <li>• For panel: GDP→Energy</li> <li>• For India: Energy↔GDP</li> <li>• For Korea, Pakistan and Taiwan: Energy→GDP</li> <li>• For Australia: GDP→Energy</li> </ul>                                                                                                                                                                                                                                                                                                                                |
| Tang, Tan [33]             | 1971–2011                          | Vietnam                         | Energy→GDP                                                                                                                                                                                                                                                                                                                                                                                                                                                                                                                           |
| Esso and Keho [34]         | 1971–2010                          | 12 countries                    | <ul style="list-style-type: none"> <li>• For Congo and Gabon: Energy→GDP</li> <li>• For Ghana: GDP→Energy</li> </ul>                                                                                                                                                                                                                                                                                                                                                                                                                 |
| Bah and Azam [35]          | 1971–2012                          | South Africa                    | GDP--Energy (electricity)                                                                                                                                                                                                                                                                                                                                                                                                                                                                                                            |
| Bildirici and Ozaksoy [36] | 1980–2012                          | 20 countries                    | <ul style="list-style-type: none"> <li>• For Botswana, Cameroon, Uganda, and Zambia: GDP→Energy (biomass)</li> <li>• For Burkina Faso, Malawi, Central African Republic, Namibia, Côte d’Ivoire, Djibouti, Gabon and Zimbabwe: Energy (biomass) →GDP</li> <li>• For Kenya, Lesotho, Madagascar and Togo: GDP↔Energy (biomass)</li> </ul>                                                                                                                                                                                             |
| Goh, Yong [37]             | 1966–2013                          | OECD countries                  | <ul style="list-style-type: none"> <li>• For Denmark, Germany, Greece and the United States: Energy→GDP</li> <li>• For Iceland: GDP→Energy</li> <li>• For Japan, Austria, Ireland, Portugal and Spain: Energy↔GDP</li> <li>• For Australia, Belgium, Canada, Finland, France, Italy, Luxembourg, the Netherlands, Norway, Sweden, Turkey and the UK: GDP--Energy</li> </ul>                                                                                                                                                          |
| Kahouli [38]               | 1995–2015                          | 6 South Mediterranean Countries | <ul style="list-style-type: none"> <li>• For Tunisia: GDP↔Energy</li> <li>• For Israel: Energy→GDP</li> <li>• For Lebanon: GDP→Energy</li> <li>• For Algeria, Egypt and Morocco: GDP--Energy</li> </ul>                                                                                                                                                                                                                                                                                                                              |
| Kourtzidis, Tzeremes [39]  | January 1991 to May 2016 (Monthly) | the United States               | <ul style="list-style-type: none"> <li>• For all sectors (Industry, Residential, Electric Power and Transportation): GDP--Energy</li> <li>• For the whole country: Energy→GDP</li> </ul>                                                                                                                                                                                                                                                                                                                                             |

“→” stands for “unidirectional Granger causality” from the left to the right hand-side variable, “--” stands for “no Granger causality” and “↔” stands for “bidirectional Granger causality”.

<https://doi.org/10.1371/journal.pone.0197785.t002>

main drawback is that if the original series is stationary at first difference, the HP filtering causes distortion to its dynamics by inducing spurious information in the cyclical components. In contrary to this, wavelet decomposition which is used in this study is a better alternative. It formalizes the concept of decomposition [49] and it is proven to preserve the information in the series before and after the filtering. The studies that considered the univariate analysis of the time-frequency domain in the energy literature are Ozun and Cifer [50], and Aslan, Apergis [51]. Ozun and Cifer [50] conducted the first study to examine energy-growth nexus using wavelet multi-scale analysis for Turkey. They managed to identify causality relationships at different time scales which were not revealed by Soytaş and Sari [52] who used the same dataset. Likewise, Aslan, Apergis [51] applied the wavelet decomposition method to the US energy market and found that energy consumption is influenced by GDP in the short term, but bidirectional relationships had prevailed over the medium and long term. Therefore, the differences in the results in the time-frequency domain would not be discovered if the original series were used without decomposition. Inspired by these studies, we decompose the data series of energy consumption and economic growth to study the causality relationship on a scale by scale basis for China in a multivariate setting.

Secondly, this study also aims to capture the information on the nonlinear causality relationship. Payne [41] argued that the information captured by linear causality test may not be adequate to reveal the energy-growth nexus. Few studies detected nonlinear causality in the international markets, e.g. Lee and Chang [53], Chiou-Wei, Chen [54], and Dergiades, Martinopoulos [55]. However, the reliability of their conclusions can be questioned due to shortcomings of the techniques adopted. For example, Chiou-Wei, Chen [54] admitted the technique that they have used may have caused over-rejection of the hypothesis tested despite the promising results. In our study, we adopt the newly proposed consistent technique by Nishiyama, Hitomi [56] on the nonlinear causality analysis that will help to produce statistically reliable results. Overall, the novelty of combining the wavelet analysis with both linear and nonlinear causality test helps to reveal hidden information on the energy-growth nexus in China.

This study brings a significant contribution to the existing literature in at least two aspects. First, in lieu of concluding a single energy-growth nexus, this study is able to break down the relationships of energy and economy growth into short, medium, and long-term. This is very important especially for energy policy planning and decision making, where development strategies are expected to vary for different time-frequency domain to overcome the existing policy implementation issue. A more targeted short or long-term energy policy is more desirable as it would lead to resource allocation and cost efficiency. In addition, many studies may have overlooked the nonlinear granger causality effect, and the studies that took this into account had used the usual nonlinear test (such as Hiemstra and Jones [57]) that suffers from spurious regression problem especially for small sample sizes [58]. Thus, this study puts more emphasis on testing the nonlinear granger causality effect by employing a more appropriate nonlinear granger causality test developed by Nishiyama, Hitomi [56].

The rest of this article is organized as follows. Empirical methods and data source are discussed in section 2. Section 3 reports the results and section 4 offers the concluding remarks.

## Data and methodology

### Empirical model and data

The main aim of this paper is to examine the relationship between economic growth and energy consumption. We use the neoclassical production function following the previous works by Wang, Wang [18] and Tang and Shahbaz [59], in which energy is treated as a

separate production input other than labour and capital:

$$GPC_t = f(K_t, L_t, EC_t) \tag{1}$$

where  $GPC_t$ ,  $K_t$ ,  $L_t$ ,  $EC_t$  are the aggregate output (real GDP) per capita, real capital stock per capita, average labour population, and energy consumption per capita. All the per capita values are calculated by dividing the respective variable by the population size. The subscript  $t$  denotes the time period from 1953 to 2013. The data of real GPC is obtained by adjusting the nominal GPC with the GPC deflator (base 1952). This deflator is called GDP per Capita index, which is released directly by the National Bureau of Statistics of China. The GPC index is obtained by dividing the real GPC (i.e. the GDP per capita of the current year at the constant price of the base year) with the base year's GPC at its current price. To obtain the real GPC of 2013 at the constant price of base year 1953, for example, we multiply the GPC at its current price in base year 1953 with the GPC index of 2013. The data of real capital stock per capita from 1953 to 2008 is provided by Shan [60]; the remaining data (2009 to 2013) is updated using the perpetual inventory method described by Shan [60] with the updated input data released. All the annual data are collected from the National Bureau of Statistics of China. All variables are expressed in natural logarithm.

### Time-frequency wavelet decomposition

Wavelet decomposition uses an adjustable window for different frequencies by compressing or dilating the original series so that both time and frequency information can be preserved. There are two types of wavelet transform, namely, discrete wavelet transform (DWT) and continuous wavelet transform (CWT). Due to the computational complexity and informational redundancy of CWT, DWT is more preferred in the literature. Generally, DWT decomposes the time series into components associated with different time scales. The short time scale corresponds to high frequency while the long time scale represents low frequency. Wavelets analysis consists of two basic wavelet functions, the father wavelet  $\phi$  and the mother wavelet  $\psi$ .

$$\phi_{j,k}(t) = 2^{-j/2} \phi[(t - 2^j k)/2^j], \tag{2}$$

$$\psi_{j,k}(t) = 2^{-j/2} \psi[(t - 2^j k)/2^j], \tag{3}$$

where  $j = 1, \dots, J$  in a  $J$ -level decomposition, and  $k = 1, \dots, K$ , which is the number of coefficients in the corresponding level  $J$ . The largest scales or decomposition level is calculated by:

$$J = \log_2(N) \tag{4}$$

where  $N$  is the length of the time series.

The father wavelet reconstructs the low frequencies component of a series and integrates to 1, whereas the mother wavelet represents short-term variation from the trend and integrates to 0. With these features, the decomposition will ensure that the information in the original series is retained in the decomposed series. In practice, there are different types of wavelets available that suit the needs of studying a variety of time series. In this study, we choose the Daubechies Least Asymmetric wavelet with the length of 8 (LA8) since Benhmad [61] pointed out that it "is orthogonal, near symmetric and have a compact support and good smoothness properties".

The orthogonal approximation of DWT representation of the original time series is as below:

$$x(t) = \sum_k s_{j,k} \phi_{j,k}(t) + \sum_k d_{j,k} \psi_{j,k}(t) + \sum_k d_{j-1,k} \psi_{j-1,k}(t) + \dots + \sum_k d_{1,k} \psi_{1,k}(t) \tag{5}$$

where  $s_{j,k}$  is the smoothing coefficients that capture the trend of the original time series  $\chi(t)$  while  $d_{j,k}, \dots, d_{1,k}$  represent the detail coefficients that contain information on the short-term deviation from the trend. Eq (5) shows that the original time series can be reconstructed by adding up the short-term and trend components. This reconstruction process is regarded as the multiresolution analysis [62].

In this study, we used Maximal Overlap DWT (MODWT) for the following reasons. Firstly, MODWT is able to handle data with any sample size, unlike DWT which restricts sample size to a multiple of  $2^j$ . Secondly, the transformation is invariant to shift, i.e. a shift in the time series will not cause alterations in the transform coefficients [63]. Unlike DWT, MODWT retains down-sampled coefficients at each level of decomposition and therefore it is a non-orthogonal approximation. The MODWT scaling coefficients  $v_{j,t}$  and detail coefficients  $w_{j,t}$  are obtained by multiplying the rescaled father wavelet filter  $\omega_l$  and rescaled mother wavelet filter  $\delta_l$  with the original time series  $\chi_t$  as follow:

$$w_{j,t} = \sum_{l=0}^{L-1} \omega_{j,l} X_{t-l \bmod N} \tag{6}$$

and

$$v_{j,t} = \sum_{l=0}^{L-1} \delta_{j,l} X_{t-l \bmod N} \tag{7}$$

where the rescaled father and mother wavelets filter for MODWT are obtained by rescaling their counterparts of DWT as:

$$\omega_{j,l} = \psi_{j,l} / 2^{j/2} \tag{8}$$

and

$$\delta_{j,l} = \phi_{j,l} / 2^{j/2} \tag{9}$$

Eqs (8) and (9) indicate that, in contrary to the DWT filters, the filters of MODWT have half energy. Thus, a time series  $x_t$  can be expressed using MODWT by substituting  $s_{j,k}$  and  $d_{j,k}$  with  $w_{j,t}$  and  $v_{j,t}$  from Eq (5).

All the time series used in this study were decomposed using the wavelet transform described above to obtain the low (long-term) and high (short-term) frequency series. The causality relationship between  $GPC_t$  and  $EC_t$  at different time-frequency domain are established using these decomposed series.

### Unit root tests

The unit root tests commonly used to check data stationarity are Augmented Dickey-Fuller (ADF) test (Said and Dickey [64], PP test (Phillips and Perron [65] and KPSS test (Kwiatkowski, Phillips [66]. All these tests may be biased against rejecting the null of unit root when the variable is stationary with a structural break [67]. Therefore, the applications of these tests may produce conflicting results. The order of integration of each of the series used in this study was further investigated using the Zivot-Andrew unit root test (ZA) as discussed in Zivot and Andrews [68]. The ZA test is an extension of the ADF test. To test the null hypothesis of a unit root against the alternative hypothesis of the stationary process with one structural break, we consider two models. Model A stated below allows for a change in the intercept and Model B allows for a change in both the intercept and slope.

$$\text{Model A : } \Delta x_t = \theta + \beta x_{t-1} + \mu DU_t(TB) + \gamma t + \sum_{j=1}^n \delta_j \Delta x_{t-j} + e_t \tag{10}$$



$$\text{Model B : } \Delta x_t = \theta + \beta x_{t-1} + \mu DU_t(TB) + \gamma t + \sigma DT_t(TB) + \sum_{j=1}^n \delta_j \Delta x_{t-j} + e_t \quad (11)$$

Where  $TB$  is the time of the structural break and  $DU_t$  and  $DT_t$  are the dummy variables for a break in the intercept and a shift in the trend respectively.  $DU_t(TB) = 1$  if  $t > TB$  and zero otherwise;  $DT_t(TB) = t - TB$  if  $t > TB$  and zero otherwise.  $\Delta$  is the operator for first differencing. The null hypothesis tested for the two models is  $\beta = 0$ , i.e. the time series  $x_t$  contains a unit root. The alternative hypothesis is  $\beta < 0$  indicating that the time series is trend stationary with a potential structural time break appearing at an unknown time point. The unit root tests were conducted to examine stationarity of the original as well as decomposed  $GPC_t$  and  $EC_t$  series.

### Linear causality test

We employed the modified Wald test (MWALD) proposed by Toda and Yamamoto [69] (hereafter T-Y) procedure in conjunction with bootstrapped critical values following the work of Hacker and Hatemi-J [70] to run the causality test between energy consumption and economic growth. This test is able to overcome the finite sample problems in the conventional Granger causality test [43], which is usually employed to detect a linear correlation between the current values of one time series with the past values of another time series. In addition to that, the T-Y approach allows fitting of a standard augmented vector autoregressive (VAR) model in the level of the series even when the data is nonstationary and perhaps cointegrated.

The VAR model used to test the direction of causality between economic growth and energy consumption is expressed as below:

$$GPC_t = \alpha_1 + \sum_{i=1}^k \theta_{11i} GPC_{t-i} + \sum_{j=k+1}^p \theta_{12j} GPC_{t-j} + \sum_{i=1}^k \phi_{11i} K_{t-i} + \sum_{j=k+1}^p \phi_{12j} K_{t-j} + \sum_{i=1}^k \psi_{11i} L_{t-i} + \sum_{j=k+1}^p \psi_{12j} L_{t-j} + \sum_{i=1}^k \gamma_{11i} EC_{t-i} + \sum_{j=k+1}^p \gamma_{12j} EC_{t-j} + \varepsilon_{1t} \quad (12)$$

$$EC_t = \alpha_2 + \sum_{i=1}^k \theta_{21i} GPC_{t-i} + \sum_{j=k+1}^p \theta_{22j} GPC_{t-j} + \sum_{i=1}^k \phi_{21i} K_{t-i} + \sum_{j=k+1}^p \phi_{22j} K_{t-j} + \sum_{i=1}^k \psi_{21i} L_{t-i} + \sum_{j=k+1}^p \psi_{22j} L_{t-j} + \sum_{i=1}^k \gamma_{21i} EC_{t-i} + \sum_{j=k+1}^p \gamma_{22j} EC_{t-j} + \varepsilon_{2t} \quad (13)$$

where  $k$  is the optimal lag order for the VAR models determined by Akaike Information Criterion, and  $\varepsilon_{it} \sim N(0,1)$ . The TY approach suggests to artificially add additional lags,  $d_{\max}$  (which is the maximum order of integration of all the time series in the model) in addition to  $k$  lags, such that  $p = k + d_{\max}$ . However, we selected  $p$  based on the Hatemi-J [71] information criterion, which is shown, by simulation, to be capable of selecting the true lag in both stable and unstable VAR models. This procedure guarantees that the usual test statistic of the Granger causality procedure follows the standard asymptotic distribution. The model was fitted for the original economic growth and energy consumption series, as well as the decomposed series.

The modified Wald (MWALD) test was applied with critical values generated by bootstrapping simulation to test for  $\gamma_{11i} \neq 0 \forall_k$  in Eq (12) and  $\theta_{21i} \neq 0 \forall_k$  in Eq (13). The former test implies that energy consumption Granger-causes real output and the latter implies that real output Granger-causes energy consumption. The procedures of MWALD and bootstrapping simulation are detailed in Toda and Yamamoto [69].

### Nonlinear causality method

To capture the nonlinear causality relationship between energy consumption and economic growth in China, we adopted a recently proposed powerful test by Nishiyama, Hitomi [56]. Using Monte Carlo simulation, the test is proved to have nontrivial power against  $\sqrt{T}$  local



alternatives, where T is the sample size. The simulation also shows that the test has good size and power properties.

This newly proposed nonlinear causality test assumes that the time series under study are stationary. To test for causality between such two stationary time series, i.e. series A and B, the standard Granger causality is defined based on the concept of the optimum linear predictor. Hence the causality from A to B is found when the linear prediction of B can be improved by the current and the past information of A as shown in Eq (14).

$$E[B_t - P(B_t|B_{t-1}, \dots, B_1)]^2 > E[B_t - P(B_t|B_{t-1}, \dots, B_1, A_{t-1}, \dots, A_1)]^2 \quad (14)$$

where P is the optimum linear predictor.

Nishiyama, Hitomi [56] replaced the linear predictor by the conditional expectation to capture the nonlinear relationship. Therefore, the possible nonlinear causality in mean (first moment) is defined as:

$$E[B_t - E(B_t|B_{t-1}, \dots, B_1)]^2 > E[B_t - E(B_t|B_{t-1}, \dots, B_1, A_{t-1}, \dots, A_1)]^2 \quad (15)$$

where E is the conditional expectation. By rearrangement, the null hypothesis becomes:

$$E[(E(B_t|B_{t-1}, \dots, B_1, A_{t-1}, \dots, A_1)) - E(B_t|B_{t-1}, \dots, B_1)]^2 = 0 \quad (16)$$

while the alternative hypothesis is:

$$E[(E(B_t|B_{t-1}, \dots, B_1, A_{t-1}, \dots, A_1)) - E(B_t|B_{t-1}, \dots, B_1)]^2 > 0 \quad (17)$$

They also constructed the test statistic based on the moment conditions. The detailed construction of the test statistics can be found in Nishiyama, Hitomi [56]. This test is considered as an omitted variable test, extensively discussed by Bierens [72, 73], Robinson [74], Bierens and Ploberger [75], and Chen and Fan [76], among others. Simulation is used to calculate the critical values for the test statistic, which are independent from the data (Gonzalo and Taa-mouti [77]). We applied this procedure in testing for non-linear causality between energy consumption and output in the different time-frequency domain.

## Results

### Causality analysis without decomposition

We first examine the causal relationship between economic growth and energy consumption using the original series as in most of the studies in the literature. Unit root tests were conducted on energy consumption per capita (EC), GDP per capita (GPC), capital stock per capita (K) and average labour population (L). Table 3 shows that all the four series are stationary at first difference except for GPC, where the KPSS test results are in conflict with the other two tests. However, the results of ZA test in Table 4 confirm that GPC is stationary after first differencing. The structural break point at year 1971 is linked to the economic leap between 1969 to 1971 [78]. During this period, investment was increased substantially and industrial construction activities were expanding which led to increase in energy consumption and enhanced economic growth. The year 1976 marked the end of the cultural revolution. The yearly sectoral growth rate of industrial and agricultural value of output was only 1.7%, which was far below the targeted growth rate of 7% to 7.5% in the economic plan [79]. This affected energy consumption as well as growth. We must emphasize, however, the purpose of the ZA test is not to identify the structural breaks or confirm whether they are significant or not but to provide more robust statistical evidence on the stationarity of the time series.

**Table 3. Unit root test results for the original time series.**

| Variable     | Specification     | ADF test  | PP test   | KPSS test |
|--------------|-------------------|-----------|-----------|-----------|
| GPC          | Intercept         | 1.908     | 3.365     | 0.957***  |
|              | Intercept & trend | -1.435    | -1.14     | 0.241     |
| $\Delta$ GPC | Intercept         | -5.490*** | -4.888*** | 0.578**   |
| EC           | Intercept         | -1.394    | -1.508    | 0.982***  |
|              | Intercept & trend | -3.210*   | -3.359*   | 0.068     |
| $\Delta$ EC  | Intercept         | -4.449*** | -4.634*** | 0.104     |
| K            | Intercept         | 0.827     | 0.345     | 0.979***  |
|              | Intercept & trend | -1.609    | -1.197    | 0.195**   |
| $\Delta$ K   | Intercept         | -4.070*** | -2.878*   | 0.186     |
| L            | Intercept         | -1.759    | -2.229    | 0.962***  |
|              | Intercept & trend | -0.788    | 0.302     | 0.175**   |
| $\Delta$ L   | Intercept         | -3.678*** | -3.502**  | 0.453*    |

The optimal number of lags for ADF tests was selected based on Schwarz information criterion (SIC). The bandwidths for KPSS and PP tests were chosen based on Newey-West selection procedure using Bartlett kernel. “ $\Delta$ ” stands for “first differencing”.

“\*”, “\*\*” and “\*\*\*” denote significance at 10%, 5% and 1% respectively.

<https://doi.org/10.1371/journal.pone.0197785.t003>

Next, we apply the bootstrapped Toda-Yamamoto test to assess the linear causality relationship. Since all the time series under study are I (1), one additional unrestricted lag is added to the VAR model in Eqs (12) and (13). The maximum lag order was fixed at 3 years. As suggested by Enders [80], this will ensure that the lag length is relatively long to capture the dynamic relationship between the series. Table 5 presents the results of Toda-Yamamoto test with bootstrap-corrected critical values. It is found that there is no causal relationship between energy consumption and economic growth based on both the *p*-values of MWALD test and the comparison of the test statistics with the bootstrapped critical values.

The linear causality test suggests evidence of neutrality hypothesis for the energy-growth nexus for China. We also applied the test proposed by Nishiyama, Hitomi [56] to detect for the possible nonlinear causal relationship. Since the variables have been confirmed to be I (1), the first differences of the variables are used to test the nonlinear causality. Therefore, this analysis focuses on the short-run nonlinear causality. The results presented in Table 6 do not indicate any evidence of the nonlinear causal relationship between energy consumption and economic growth, at least in the short run. Further analysis is conducted by decomposing the series according to their frequency domain.

### Causality analysis based on the wavelet decomposed time series

The approach to examining the energy-growth nexus in the previous section did not take into account the frequency domain of the time series. This section conducts the wavelet analysis,

**Table 4. Zivot and Andrews unit root test for original time series.**

| Variable     | Specification     | Test statistic | Break point |
|--------------|-------------------|----------------|-------------|
| GPC          | Intercept         | -1.856         | 1971        |
|              | Intercept & trend | -3.548         | 1976        |
| $\Delta$ GPC | Intercept         | -5.176**       | 1982        |
|              | Intercept & trend | -7.004***      | 1963        |

“\*\*” and “\*\*\*” denote significance at 5% and 1% respectively. “ $\Delta$ ” stands for “first differencing”. The optimal number of lags was selected based on Akaike information criterion (AIC).

<https://doi.org/10.1371/journal.pone.0197785.t004>

**Table 5. The bootstrapped Toda-Yamamoto causality test results.**

| Null Hypothesis       | MWALD statistic | p-value | 1% bootstrap critical value | 5% bootstrap critical value | 10% bootstrap critical value |
|-----------------------|-----------------|---------|-----------------------------|-----------------------------|------------------------------|
| EC $\nrightarrow$ GPC | 2.356           | 0.502   | 13.716                      | 9.103                       | 7.088                        |
| GPC $\nrightarrow$ EC | 2.13            | 0.546   | 13.897                      | 9.056                       | 7.107                        |

The optimal number of lags was selected based on HJC criteria. “ $\nrightarrow$ ” stands for “does not Granger cause”.

<https://doi.org/10.1371/journal.pone.0197785.t005>

which allows the causal relationship between energy and growth at the multi-scale level, i.e. in the short, medium and long run to be investigated.

Applying Eq (4) in section 2.2, with the sample size from 1953 to 2013, the largest decomposition level is 6. Therefore, the series GPC and EC were decomposed by wavelet transform into six series, denoted as d1, d2, d3, d4, d5 and s5. The original series is now converted into different frequencies in the time domain, where d1 represents the lowest time scale (highest frequency) that occurs at a time horizon of 2 to 4 years, while d5 represents the highest time scale (lowest frequency) of 32 to 64 years, and S5 represents the trend of the original series that occur at a time horizon longer than 64 years. Andersson [81] suggests that normally it is not necessary that all the decomposed components correspond to a specific time horizon therefore we could combine the decomposed components, e.g. d1 and d2 to a new component that correspond to 2 to 8 years instead of examining d1 and d2 individually. For example, when illustrating the multiresolution analysis on GDP growth, total factor productivity growth and consumer price inflation from 1902 to 2010, Andersson [81] considered three time horizons: the short run (2 to 8 years), the medium run (8 to 32 years) and long run (32 years and above) so that the short run corresponds approximately to the Kitchin cycles, the medium run corresponds approximately to the Kuznets cycles and the long run corresponds to Kondratieff cycles. Hence, following the similar logic, we combined d1 and d2 to be the series that corresponds to the short run (less than 8 years), d4 and d5 to be the long-run series (more than 16 years), while d3 represents the medium-run series (8 to 16 years), in this study.

The unit root test results for the short-, medium- and long-run decomposed time series are presented in Table 7. The results of the three unit root tests strongly suggest that the short and medium-run time series are stationary at level. The results of the unit root tests on the long-run time series are inconsistent. Therefore, their stationarity is re-examined using the ZA test. The results in Table 8 confirm that the long-run series of energy consumption per capita and GDP per capita are both I (0). As explained earlier, the structural break point at 1971 could be linked to the economic leap in the earlier 1970s that also affected the long-run movements of the series. The economic policy from 1993 to 1996 was implemented by the central government to curb high inflation while maintaining economic growth, which was achieved by the end of year 1996 [82], and had accelerated growth that demanded higher energy consumption.

The bootstrapped Toda-Yamamoto causality test was subsequently applied. Table 9 shows that in the short run, there is a unidirectional causal relationship from energy consumption to economic growth while there is a unidirectional causal relationship from economic growth to energy consumption in the medium run. In the long run, the causal relationship between

**Table 6. Nonlinear causality test results.**

| Null Hypothesis                     | Test statistic | Null Hypothesis                     | Test statistic |
|-------------------------------------|----------------|-------------------------------------|----------------|
| $\Delta EC \nrightarrow \Delta GPC$ | 8.467          | $\Delta GPC \nrightarrow \Delta EC$ | 7.405          |

“ $\Delta$ ” stands for “first differencing”. “ $\nrightarrow$ ” stands for “does not Granger cause”.

<https://doi.org/10.1371/journal.pone.0197785.t006>

**Table 7. Unit root test results for wavelet decomposed series.**

| Variable                 | Specification | ADF test   | PP test   | KPSS test |
|--------------------------|---------------|------------|-----------|-----------|
| <b>Short run (d1+d2)</b> |               |            |           |           |
| GPC                      | Intercept     | -11.299*** | -6.104*** | 0.181     |
| EC                       | Intercept     | -6.799***  | -6.983*** | 0.166     |
| <b>Medium run (d3)</b>   |               |            |           |           |
| GPC                      | Intercept     | -3.192**   | -3.906*** | 0.026     |
| EC                       | Intercept     | -5.807***  | -3.639*** | 0.029     |
| <b>Long run (d4+d5)</b>  |               |            |           |           |
| GPC                      | Intercept     | -9.465***  | 0.731     | 0.222     |
| $\Delta$ GPC             | Intercept     | -0.385     | -1.394    | 0.551**   |
| EC                       | Intercept     | -3.362**   | -2.445    | 0.127     |
| $\Delta$ EC              | Intercept     | -1.889     | -2.052    | 0.187     |

The optimal numbers of lags for ADF tests were selected based on SIC. The bandwidths for KPSS and PP tests were chosen based on Newey-West selection procedure using Bartlett kernel. “ $\Delta$ ” stands for “first differencing”.

“\*\*” and “\*\*\*” denote significance at 5% and 1% respectively.

<https://doi.org/10.1371/journal.pone.0197785.t007>

**Table 8. Zivot and Andrews unit root test for decomposed series.**

| Variable                | Specification | T statistic | Break point |
|-------------------------|---------------|-------------|-------------|
| <b>Long run (d4+d5)</b> |               |             |             |
| GPC                     | Intercept     | -5.366***   | 1997        |
| EC                      | Intercept     | -7.112***   | 1971        |

“\*\*\*” denotes significance at 1%. The optimal number of lags was selected based on Akaike information criterion.

<https://doi.org/10.1371/journal.pone.0197785.t008>

economic growth and energy consumption is bidirectional. These results are supported by both the *p*-values and comparison of the test statistics to the critical values. The findings suggest that the tests without taking into account the time-frequency information of the series produce misleading results. With multi-scale information on the time series variables, the causal relationship between EC and GPC is now uncovered.

We further examined the causality relationship using the nonlinear causality test. Table 10 shows that there is no nonlinear causal relationship in the short and medium run. However,

**Table 9. Bootstrapped Toda-Yamamoto causality test results for the decomposed time series.**

| Null Hypothesis                         | MWALD     | Lag | <i>p</i> -value | 1% bootstrap critical value | 5% bootstrap critical value | 10% bootstrap critical value |
|-----------------------------------------|-----------|-----|-----------------|-----------------------------|-----------------------------|------------------------------|
| <b>EC <math>\nRightarrow</math> GPC</b> |           |     |                 |                             |                             |                              |
| Short run                               | 11.680**  | 3   | 0.009 (-0.679)  | 13.089                      | 8.486                       | 6.745                        |
| Medium run                              | 7.838     | 3   | 0.05            | 17.083                      | 11.257                      | 8.569                        |
| Long run                                | 25.246*** | 3   | 0.000 (0.212)   | 23.956                      | 15.554                      | 12.372                       |
| <b>GPC <math>\nRightarrow</math> EC</b> |           |     |                 |                             |                             |                              |
| Short run                               | 7.318     | 3   | 0.062           | 13.07                       | 8.643                       | 6.88                         |
| Medium run                              | 5.211***  | 3   | 0.000 (-0.046)  | 17.907                      | 11.872                      | 9.265                        |
| Long run                                | 13.501**  | 3   | 0.003 (0.212)   | 17.568                      | 11.574                      | 9.503                        |

“\*\*” and “\*\*\*” denote significance at the 5% and 1% level respectively according to the bootstrap critical values. The optimal number of lags was selected based on HJC criteria.  $\nRightarrow$  stands for “does not Granger cause”. The numbers in parentheses are the sum of the lagged coefficients.

<https://doi.org/10.1371/journal.pone.0197785.t009>

**Table 10. Nonlinear causality test results for the decomposed time series.**

| Null Hypothesis       | Test statistic | Null Hypothesis       | Test statistic |
|-----------------------|----------------|-----------------------|----------------|
| EC $\nrightarrow$ GPC |                | GPC $\nrightarrow$ EC |                |
| Short run             | 7.438          | Short                 | 5.237          |
| Medium run            | 8.511          | Medium                | 9.962          |
| Long run              | 22.586*        | Long                  | 24.910*        |

\* denote significance level 1%. " $\nrightarrow$ " stands for "does not Granger cause".

<https://doi.org/10.1371/journal.pone.0197785.t010>

a bidirectional nonlinear causal relationship between energy consumption and economic growth is found in the long run.

## Discussion

The results of both linear and nonlinear causality tests on the original time series support the neutrality hypothesis, i.e., there is no any causal relationship between energy consumption and economic growth in China from 1953 to 2013. These findings are consistent with the studies of Soytas and Sari [13], Chen, Kuo [15], Yalta and Cakar [19] and Bah and Azam [35], but contradictory with other studies such as Wang, Wang [18], Zhang and Yang [20], Tang, Tan [33], Bloch, Rafiq [21] and Bildirici and Ozaksoy [36].

Caution, however, must be taken before drawing any policy implications from these results. Ma and Oxley [83] suggested that short-run energy-growth nexus may be different from the long-run relationships. The results from the tests conducted on the decomposed time series confirm the conjecture of Ma and Oxley [83]. In the short run, energy consumption is found to Granger cause economic growth. The causality direction is from economic growth energy consumption in the medium run. In the long run, energy consumption and economic growth mutually Granger cause each other. These results show that the energy-growth nexus in China is much more complex than the neutrality hypothesis can explain. It is evident that the wavelet multi-scale analysis in this study reveals the information on energy-growth nexus across different time horizons that may otherwise be hidden if only the whole long-term time series is used. Zhang and Yang [20] reported a negative bidirectional causal relationship between real GDP and energy consumption in China. Consistent with their findings, the wavelet multi-scale analysis identifies a negative nexus between energy consumption and real economic output in this study. However, the negative causality is not bidirectional but consists of two unidirectional negative causal relationships running from opposite directions at different time horizons (as shown in Fig 2). In the short run, the estimated causal parameter is -0.679, which means a 1% increase in energy consumption per capita will cause a 0.679% decrease in real GDP per capita. In the medium run, the estimated causal parameter is -0.046, which means a 1% increase in real GDP per capita will cause a decrease in energy consumption per capita. In line with Squalli [84], there are some explanations on these two negative causal relationships. In the short run, the negative causality running from energy consumption per capita to real GDP per capita may result from the shift of production to less energy intensive service sectors. The excessive energy consumption in unproductive sectors combining with capacity constraints may also contribute to such negative causality. In the medium run, many factors can lead to negative causality running from real GDP per capita to energy consumption per capita. One is that the constraints due to hindrances related to infrastructure may force energy consumption to reduce as the economy expands. In addition, the demand of energy for any other goods and services can decrease due to the combined effect of factors such as politics, mismanagement or inequitable distribution of national income. In the long run, it is interesting that

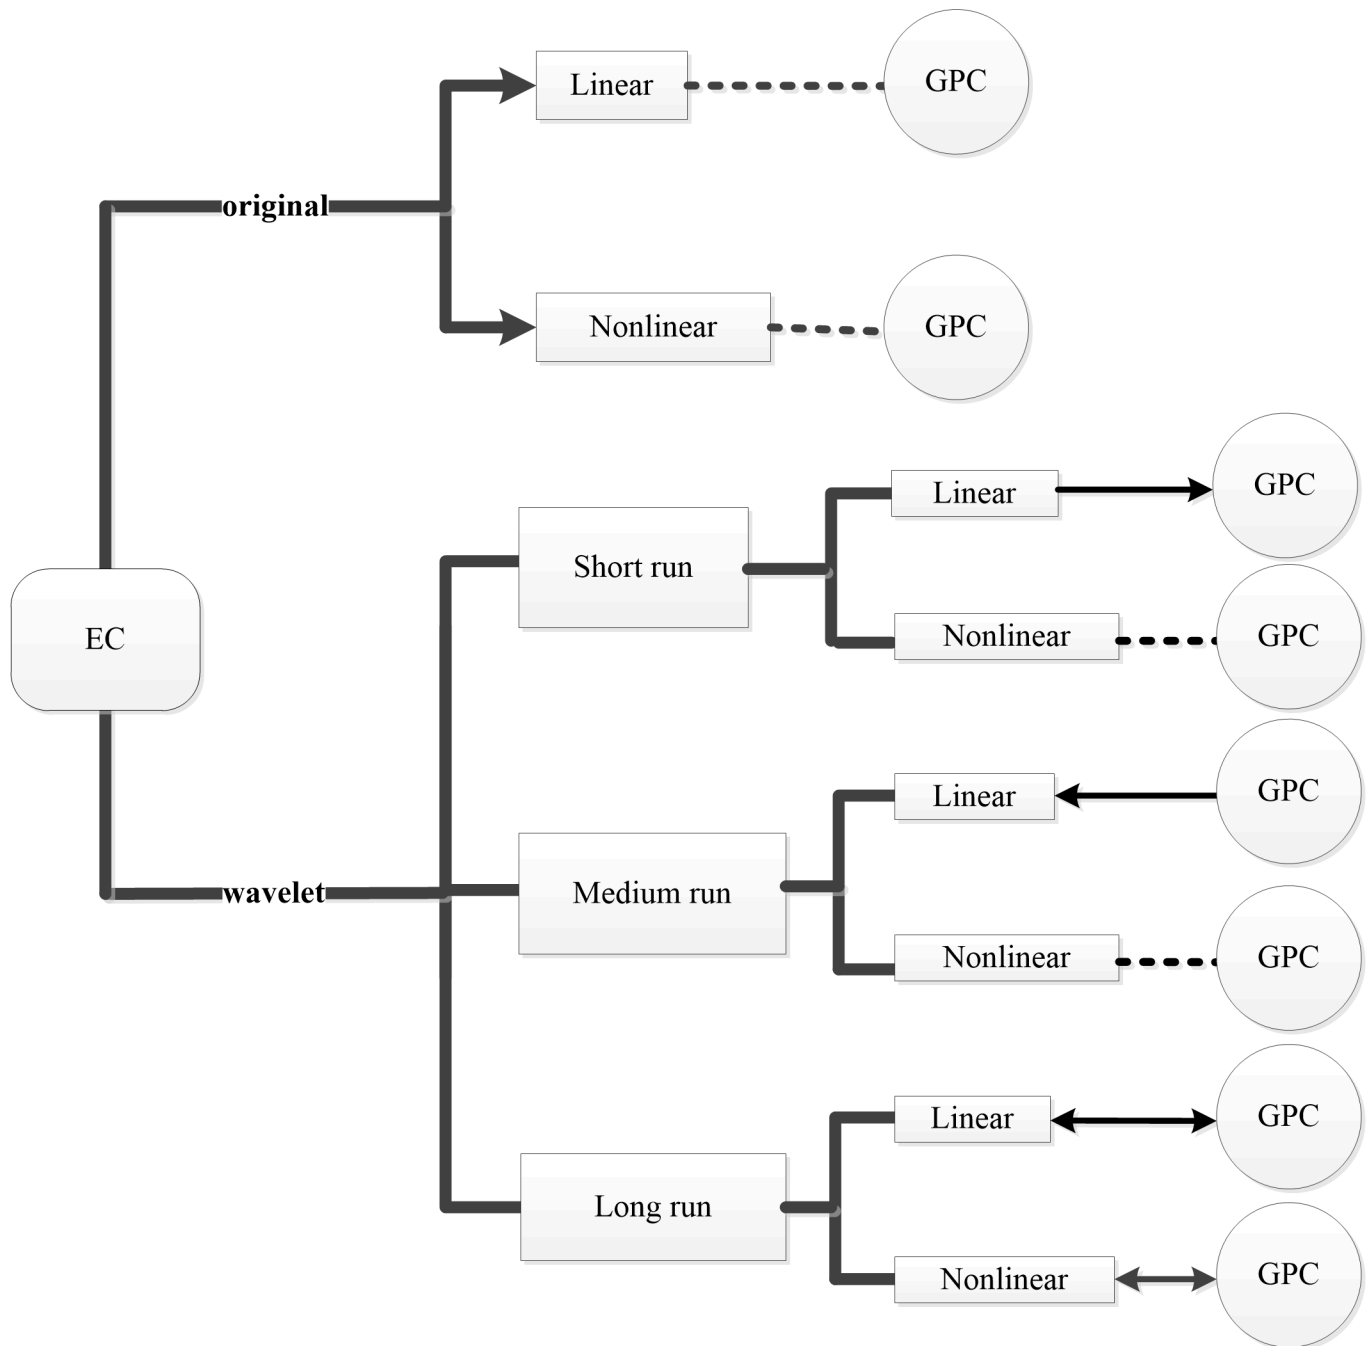

**Fig 2. The causal relationship between energy consumption and economic output.** “EC” indicates energy consumption per capita. “GPC” indicates GDP per capita. “Original” indicates the results using original time series. “Wavelet” indicates that the original time series are decomposed by wavelet transform. “→” stands for “unidirectional Granger cause from left to right”, “←” stands for “unidirectional Granger cause from right to left”, “- -” stands for “does not Granger cause” and “↔” stands for “bidirectional Granger relationship”.

<https://doi.org/10.1371/journal.pone.0197785.g002>

the estimated causal parameters for causality running from both directions have about the same magnitude, 0.212. This suggests that 1% increase in energy consumption per capita will cause real GDP per capita to increase by 0.212% and vice versa. This positive bidirectional causal relationship between energy consumption per capita and real GDP per capita supports



the feedback hypothesis, i.e. energy and economic output are interdependent. The results of linear causality test are further strengthened by the nonlinear bidirectional energy-growth nexus in the long run found by applying the nonlinear causality test on the decomposed time series. The nonlinear causal relationship also reveals that energy consumption per capita and real GDP per capita in China have been affected by structural changes due to economic events or changes in energy policy.

## Conclusion and policy recommendations

This paper applied the wavelet multi-scale analysis with linear and nonlinear causality tests on time series data from 1953 to 2013 to investigate the causal relationship between energy consumption and economic growth in China. For the original time series, both linear and nonlinear causality tests failed to detect any causal relationship between the two variables. However, the wavelet multi-scale analysis reveals hidden information on energy-growth nexus in China. A negative unidirectional linear causality running from energy consumption to real output was found in the short run while the direction of this unidirectional causality reversed in the medium run. Both the linear and nonlinear causality tests support the feedback hypothesis for the long run. Overall, the energy-growth nexus is rather complex for China. The results effectively complement existing research by revealing the interaction between energy consumption and economic growth for different time scales in China. These findings are useful for policy makers of China to plan prudently to meet the developmental goals in different time horizons.

In the short run, the negative causality from energy to growth implies a shift of production to less energy-intensive sectors. This is reflected in energy policies of China during recent years. In the plan, the National Development and Reform Commission of China [85] set adjustment of the industrial structure as one important way to move towards energy conservation. It aimed to speed up the growth of tertiary industry (service industry) and high technology industry (information technology industry) and designed policies to limit the dependence on energy-intensive sectors. For example, in terms of production capacity, the expansion of energy-intensive enterprises must be justified at the initial stage. Major energy consuming enterprises that consume more than 10,000 tons (coal equivalent) must report their state of energy consumption. Moreover, old and energy intensive products and equipment were to be discarded regularly and any business activities related to these discarded products and equipment will be severely punished. Besides these actions, China has reduced tax rebate and increased export tariffs on energy-intensive products step by step since 2004 to limit the exports of energy-intensive products [86]. There may also be other explanations, e.g. excessive energy consumption in unproductive sectors. The low productivity of the state-owned sectors in China was studied by many researchers, e.g. Brandt, Tombe [87] and Huang, Li [88]. The domestic state-owned industrial companies, both consumers and producers of energy, all profited from massive energy subsidies [89]. The discussion by Haley and Haley [90] showed that the policy of energy subsidies caused distortion of price and led to the excessive usage of energy by Chinese companies [91], highlighting the problem of excessive energy usage in unproductive sectors in China. Based on the two justifications of negative causality in the short run, there are several policy suggestions. First, the plan on industrial structure adjustment should be constantly monitored. The transformation in industrial structure from energy-intensive to less energy-intensive and knowledge-based in the process of industrialization poses a big challenge. Reasonably, it cannot be achieved in the near future. The restructuring process should be kept on the right track not only in the short run but the momentum should also be maintained in the long run. Moreover, the reduction of energy consumption by these implemented mechanisms should not be the only focus but also their effectiveness in

solving environmental problems. Qi, Winchester [86] found that the production of machinery and equipment contributed the most to the export-embodied CO<sub>2</sub> of China compared to energy-intensive products. They showed by simulation that the shift “from industry-based to service-based” development in China would significantly influence its trade-embodied CO<sub>2</sub> emission only if trade surplus decreases as a result of this shift. Therefore, if solving the environmental problem is one of the prioritized targets, the effectiveness of economy restructuring on emission reduction should be evaluated regularly. Second, the development of the less energy-intensive sectors should also be monitored closely so that no excessive energy is consumed and an improvement in productivity is achieved. Yao [92] is of the view that the development of service industry does not necessarily lead to energy saving and emission reduction. Furthermore, differences within the service industry among different sectors make a blanket definition of service industry as environmentally friendly arbitrary. Hence, a thorough investigation on the structure and characteristics of the service industry should be implemented, especially on the energy intensity and energy consumption patterns of its inner sectors. Effective policies should be designed to ensure that the service industry will be more energy-efficient and able to contribute effectively to China’s green development. Third, the government should identify any excessive energy consumption in the unproductive sectors, especially in the state-owned industrial companies. The heavy energy subsidies should be eliminated gradually to avoid price distortion that causes excessive energy consumption. International Monetary Fund [93] advised that reforms on energy subsidies should be implemented globally since they may greatly benefit the world both economically and environmentally. In line with this, China is planning to set the timetable for the removal of the subsidies of fossil energy step by step in its short-, medium- and long-term plans for fossil energy reform [94].

In the medium run, the negative causality running from economic growth to energy consumption may augur well for sustainable development, i.e., increasing economic growth with less energy input. However, it must be ensured that the negative causality from growth to energy is not caused by other factors such as hindrances related to infrastructure and management. These hindrances, if identified, must be removed to avoid unnecessary energy shortage in the economy. For example, the shortage of coal supply during the reform period of China was partially due to the lack of railway capacity for supply delivery. China has made substantial investments in improving transportation and other economic infrastructures. For example, 55 main infrastructure projects were approved by the National Development and Reform Commission [95]. Out of these projects, 45 are related to transportation infrastructure. As for the management issue, Zhao, Lyon [96] concluded that power shortage and surplus were caused by the reliance on centralized electricity management system for price determination. Wei and Li [91] found that energy supply was misallocated among manufacturing companies in Zhejiang Province, China. Therefore, the energy management must be improved by focusing on price reforms and mitigation of energy misallocation.

For the long run, the bidirectional causality relationship between economic growth and energy consumption suggests that the energy conservation policy must be carefully crafted to avoid undesirable impact on economic development. The dependence of economic growth on energy consumption implies that any energy shocks such as those that resulted from energy conservation policies with poor structure and inappropriate approach may hamper economic growth. Given that the main source of energy is still coal, oil and gas, direct energy conservation policy alone will not reasonably benefit the country in the long run. Therefore, policies should aim more on the development of energy efficiency technologies and the green technology such as the wind and solar energy, rather than reducing the total energy consumption directly. Realizing this, the Chinese Government has set the target in the 12<sup>th</sup> five-year plan to make major investments in clean energy and clean energy cars besides energy conservation

[97]. The Strategic Action Plan for Energy Development (2014–2020) focuses on the implementation for energy efficiency improvement and aims to vigorously develop renewable energy so that by 2020 non-fossil energy is expected to account for 15% of the primary energy consumption [98]. However, two important points must be borne in mind. First, clean energy is a must, not an alternative. This means that the government must ensure that the targets set for the coming years are to be achieved to sustain the economic growth. The studies that have been conducted to evaluate the policy impact of China's renewable energy plan showed that while some achievements have been made, problems and challenges still exist [99, 100]. The potential problems and challenges must be overcome in order to design a more comprehensive plan for renewable energy production and technology. Second, the empirical results of the nonlinear causality test suggest that energy consumption and economic growth are inextricably connected to each other. Given the dependence of the Chinese economy on energy consumption, the government should be extra cautious on the potential impact of any unforeseen negative energy shocks on economic growth. These shocks may be, for example, either due to poorly designed energy conservation policies or hindrance in infrastructure. Moreover, the impact of any structural changes on energy-growth nexus must be carefully studied. The ambitious plan of developing renewable energy is relatively new to China. The process of increasing the share of renewable energy rapidly given the heavy dependence of the Chinese economy on traditional fossil energy will not be easy. To sustain its economic growth with no abrupt shock, the government must take the nonlinear causal relationship between energy and growth into consideration to implement an appropriate long-term and well-planned energy policy.

## Supporting information

### S1 File. Processed data.

(ZIP)

### S2 File. Codes and original results.

(PDF)

### S3 File. Raw data.

(XLSX)

## Acknowledgments

We thank two anonymous reviewers for their helpful comments that improved the paper. Any remaining errors are our own.

## Author Contributions

**Conceptualization:** Kim-Leng Goh.

**Formal analysis:** Junsheng Ha, Kim-Leng Goh.

**Investigation:** Junsheng Ha.

**Methodology:** Pei-Pei Tan.

**Software:** Junsheng Ha.

**Supervision:** Pei-Pei Tan, Kim-Leng Goh.

**Writing – original draft:** Junsheng Ha.

**Writing – review & editing:** Pei-Pei Tan, Kim-Leng Goh.

## References

1. World bank. Country overview, China 2013 [6/12/2013]. <http://www.worldbank.org/en/country/china/overview>.
2. World bank. Country data, China 2013 [6/12/2013]. <http://data.worldbank.org/country/china>.
3. John R. China's new industrial revolution: [www.china.org.cn](http://www.china.org.cn); 2013 [updated August 27, 2013 July 1, 2015]. [http://www.china.org.cn/opinion/2013-08/27/content\\_29838533.htm](http://www.china.org.cn/opinion/2013-08/27/content_29838533.htm).
4. U.S. Energy Information Administration. Country analysis brief, China 2013 [updated September 4, 2012 July 1, 2015]. <http://www.eia.gov/countries/analysisbriefs/China/china.pdf>.
5. Schwab K. The Global Competitiveness Report 2013–2014. 2013.
6. The New York Times. China overtakes U.S. in greenhouse gas emissions 2007 [07/12/2013]. [http://www.nytimes.com/2007/06/20/business/worldbusiness/20iht-emit.1.6227564.html?\\_r=0](http://www.nytimes.com/2007/06/20/business/worldbusiness/20iht-emit.1.6227564.html?_r=0).
7. Kraft J, Kraft A. Relationship between energy and GNP. *J Energy Dev*; (United States). 1978; 3(2).
8. Abosedra S, Baghestani H. New evidence on the causal relationship between United States energy consumption and gross national product. *Journal of Energy and Development*. 1991; 14(2):285–92.
9. Stern DI. Energy and economic growth in the USA: a multivariate approach. *Energy Economics*. 1993; 15(2):137–50.
10. Zarnikau J. Reexamination of the causal relationship between energy consumption and gross national product. *Journal of Energy and Development*. 1996; 21(2).
11. Ma H, Oxley L, Gibson J. China's energy economy: A survey of the literature. *Economic systems*. 2010; 34(2):105–32.
12. Shiu A, Lam P-L. Electricity consumption and economic growth in China. *Energy policy*. 2004; 32(1):47–54.
13. Soytaş U, Sari R. Can China contribute more to the fight against global warming? *Journal of Policy Modeling*. 2006; 28(8):837–46.
14. Zou G, Chau K. Short-and long-run effects between oil consumption and economic growth in China. *Energy Policy*. 2006; 34(18):3644–55.
15. Chen S-T, Kuo H-I, Chen C-C. The relationship between GDP and electricity consumption in 10 Asian countries. *Energy Policy*. 2007; 35(4):2611–21.
16. Yuan J, Zhao C, Yu S, Hu Z. Electricity consumption and economic growth in China: cointegration and co-feature analysis. *Energy Economics*. 2007; 29(6):1179–91.
17. Zhang X-P, Cheng X-M. Energy consumption, carbon emissions, and economic growth in China. *Ecological Economics*. 2009; 68(10):2706–12.
18. Wang Y, Wang Y, Zhou J, Zhu X, Lu G. Energy consumption and economic growth in China: A multivariate causality test. *Energy Policy*. 2011; 39(7):4399–406.
19. Yalta AT, Cakar H. Energy consumption and economic growth in China: A reconciliation. *Energy Policy*. 2012; 41:666–75.
20. Zhang W, Yang S. The influence of energy consumption of China on its real GDP from aggregated and disaggregated viewpoints. *Energy Policy*. 2013; 57:76–81.
21. Bloch H, Rafiq S, Salim R. Economic growth with coal, oil and renewable energy consumption in China: Prospects for fuel substitution. *Economic Modelling*. 2015; 44:104–15. <http://dx.doi.org/10.1016/j.econmod.2014.09.017>.
22. Ouyang Y, Li P. On the nexus of financial development, economic growth, and energy consumption in China: New perspective from a GMM panel VAR approach. *Energy Economics*. 2018; 71:238–52.
23. Essegir A, Khouni LH. Economic growth, energy consumption and sustainable development: The case of the Union for the Mediterranean countries. *Energy*. 2014; 71:218–25. <http://dx.doi.org/10.1016/j.energy.2014.04.050>.
24. Salahuddin M, Gow J. Economic growth, energy consumption and CO2 emissions in Gulf Cooperation Council countries. *Energy*. 2014; 73(0):44–58. <http://dx.doi.org/10.1016/j.energy.2014.05.054>.
25. Iyke BN. Electricity consumption and economic growth in Nigeria: A revisit of the energy-growth debate. *Energy Economics*. 2015; 51:166–76.
26. Bastola U, Sapkota P. Relationships among energy consumption, pollution emission, and economic growth in Nepal. *Energy*. 2015; 80(0):254–62. <http://dx.doi.org/10.1016/j.energy.2014.11.068>.
27. Rahman MS, Ha J, Shahari F, Aslam M, Masud MM, Banna H, et al. Long-run relationship between sectoral productivity and energy consumption in Malaysia: An aggregated and disaggregated viewpoint. *Energy*. 2015; 86:436–45. <http://dx.doi.org/10.1016/j.energy.2015.04.049>.

28. Naser H. Analysing the long-run relationship among oil market, nuclear energy consumption, and economic growth: An evidence from emerging economies. *Energy*. 2015; 89:421–34.
29. Balaguer J, Ripollés J. Examining the stability of the long-run relationship between energy and GDP in the presence of an industrialization process. *Energy Sources, Part B: Economics, Planning, and Policy*. 2016; 11(8):690–7.
30. Chiou-Wei S-Z, Zhu Z, Chen S-H, Hsueh S-P. Controlling for relevant variables: Energy consumption and economic growth nexus revisited in an EGARCH-M (Exponential GARCH-in-Mean) model. *Energy*. 2016; 109:391–9.
31. Destek MA. Natural gas consumption and economic growth: Panel evidence from OECD countries. *Energy*. 2016; 114:1007–15.
32. Fang Z, Chang Y. Energy, human capital and economic growth in Asia Pacific countries—Evidence from a panel cointegration and causality analysis. *Energy Economics*. 2016; 56:177–84.
33. Tang CF, Tan BW, Ozturk I. Energy consumption and economic growth in Vietnam. *Renewable and Sustainable Energy Reviews*. 2016; 54:1506–14. <http://dx.doi.org/10.1016/j.rser.2015.10.083>.
34. Ezzo LJ, Keho Y. Energy consumption, economic growth and carbon emissions: Cointegration and causality evidence from selected African countries. *Energy*. 2016; 114:492–7.
35. Bah MM, Azam M. Investigating the relationship between electricity consumption and economic growth: Evidence from South Africa. *Renewable and Sustainable Energy Reviews*. 2017; 80:531–7.
36. Bildirci M, Ozaksoy F. The relationship between woody biomass consumption and economic growth: Nonlinear ARDL and causality. *Journal of Forest Economics*. 2017; 27:60–9.
37. Goh SK, Yong JY, Lau CC, Tang TC. Bootstrap ARDL on energy-growth relationship for 22 OECD countries. *Applied Economics Letters*. 2017; 24(20):1464–7.
38. Kahouli B. The short and long run causality relationship among economic growth, energy consumption and financial development: Evidence from South Mediterranean Countries (SMCs). *Energy Economics*. 2017; 68:19–30.
39. Kourtzidis SA, Tzeremes P, Tzeremes NG. Re-evaluating the energy consumption-economic growth nexus for the United States: An asymmetric threshold cointegration analysis. *Energy*. 2018; 148:537–45.
40. Karanfil F. How many times again will we examine the energy-income nexus using a limited range of traditional econometric tools? *Energy Policy*. 2009; 37(4):1191–4.
41. Payne JE. Survey of the international evidence on the causal relationship between energy consumption and growth. *Journal of Economic Studies*. 2010; 37(1):53–95.
42. Ozturk I. A literature survey on energy–growth nexus. *Energy policy*. 2010; 38(1):340–9.
43. Granger CW. Investigating causal relations by econometric models and cross-spectral methods. *Econometrica: Journal of the Econometric Society*. 1969:424–38.
44. Granger CW. Testing for causality: a personal viewpoint. *Journal of Economic Dynamics and control*. 1980; 2:329–52.
45. Harvey AC, Jaeger A. Detrending, stylized facts and the business cycle. *Journal of applied econometrics*. 1993; 8(3):231–47.
46. Cogley T, Nason JM. Effects of the Hodrick-Prescott filter on trend and difference stationary time series Implications for business cycle research. *Journal of Economic Dynamics and control*. 1995; 19(1):253–78.
47. Baxter M, King RG. Measuring business cycles: approximate band-pass filters for economic time series. *Review of economics and statistics*. 1999; 81(4):575–93.
48. McCallum BT. Alternative monetary policy rules: a comparison with historical settings for the United States, the United Kingdom, and Japan. National Bureau of Economic Research, 2000.
49. Ramsey JB. The contribution of wavelets to the analysis of economic and financial data. *Philosophical Transactions of the Royal Society of London Series A: Mathematical, Physical and Engineering Sciences*. 1999; 357(1760):2593–606.
50. Ozun A, Cifer A. Multi-scale causality between energy consumption and GNP in emerging markets: evidence from Turkey. *Investment Management and Financial Innovations*. 2007; 4(2):61–70.
51. Aslan A, Apergis N, Yildirim S. Causality between energy consumption and GDP in the US: evidence from wavelet analysis. *Frontiers in Energy*. 2013:1–8.
52. Soytas U, Sari R. The relationship between energy and production: evidence from Turkish manufacturing industry. *Energy Economics*. 2007; 29(6):1151–65.
53. Lee C-C, Chang C-P. The impact of energy consumption on economic growth: evidence from linear and nonlinear models in Taiwan. *Energy*. 2007; 32(12):2282–94.

54. Chiou-Wei SZ, Chen C-F, Zhu Z. Economic growth and energy consumption revisited—Evidence from linear and nonlinear Granger causality. *Energy Economics*. 2008; 30(6):3063–76. <http://dx.doi.org/10.1016/j.eneco.2008.02.002>.
55. Dergiades T, Martinopoulos G, Tsoulfidis L. Energy consumption and economic growth: Parametric and non-parametric causality testing for the case of Greece. *Energy Economics*. 2013; 36(0):686–97. <http://dx.doi.org/10.1016/j.eneco.2012.11.017>.
56. Nishiyama Y, Hitomi K, Kawasaki Y, Jeong K. A consistent nonparametric test for nonlinear causality—Specification in time series regression. *Journal of Econometrics*. 2011; 165(1):112–27.
57. Hiemstra C, Jones JD. Testing for linear and nonlinear Granger causality in the stock price-volume relation. *The Journal of Finance*. 1994; 49(5):1639–64.
58. Diks C, Panchenko V. A note on the Hiemstra-Jones test for Granger non-causality. *Studies in Nonlinear Dynamics & Econometrics*. 2005; 9(2).
59. Tang CF, Shahbaz M. Sectoral analysis of the causal relationship between electricity consumption and real output in Pakistan. *Energy Policy*. 2013; 60:885–91.
60. Shan H. The Chinese capital stock k estimates: 1952 to 2006. *The Journal of Quantitative & Technical Economics*. 2008:17–31.
61. Benhmad F. A wavelet analysis of oil price volatility dynamics. *Economics bulletin*. 2011; 31(1):792–806.
62. Mallat SG. A theory for multiresolution signal decomposition: the wavelet representation. *Pattern Analysis and Machine Intelligence, IEEE Transactions on*. 1989; 11(7):674–93.
63. Tiwari AK, Dar AB, Bhanja N. Oil price and exchange rates: A wavelet based analysis for India. *Economic Modelling*. 2013; 31:414–22.
64. Said SE, Dickey DA. Testing for unit roots in autoregressive-moving average models of unknown order. *Biometrika*. 1984; 71(3):599–607.
65. Phillips PC, Perron P. Testing for a unit root in time series regression. *Biometrika*. 1988; 75(2):335–46.
66. Kwiatkowski D, Phillips PC, Schmidt P, Shin Y. Testing the null hypothesis of stationarity against the alternative of a unit root: How sure are we that economic time series have a unit root? *Journal of econometrics*. 1992; 54(1):159–78.
67. Perron P. The Great Crash, the Oil Price Shock, and the Unit Root Hypothesis. *Econometrica: Journal of the Econometric Society*, 1989. 1989; 57:1361–401.
68. Zivot E, Andrews DW. Further Evidence on the Great Crash, the Oil-Price Shock, and the Unit-Root Hypothesis. *Journal of Business & Economic Statistics*. 1992; 10(3):251–70.
69. Toda HY, Yamamoto T. Statistical inference in vector autoregressions with possibly integrated processes. *Journal of econometrics*. 1995; 66(1):225–50.
70. Hacker RS, Hatemi-J A. Tests for causality between integrated variables using asymptotic and bootstrap distributions: theory and application. *Applied Economics*. 2006; 38(13):1489–500.
71. Hatemi-J A. A new method to choose optimal lag order in stable and unstable VAR models. *Applied Economics Letters*. 2003; 10(3):135–7.
72. Bierens HJ. Model specification testing of time series regressions. *Journal of Econometrics*. 1984; 26(3):323–53.
73. Bierens HJ. Consistent model specification tests. *Journal of Econometrics*. 1982; 20(1):105–34.
74. Robinson PM. Hypothesis testing in semiparametric and nonparametric models for econometric time series. *The Review of Economic Studies*. 1989; 56(4):511–34.
75. Bierens HJ, Ploberger W. Asymptotic theory of integrated conditional moment tests. *Econometrica: Journal of the Econometric Society*. 1997:1129–51.
76. Chen X, Fan Y. Consistent hypothesis testing in semiparametric and nonparametric models for econometric time series. *Journal of Econometrics*. 1999; 91(2):373–401.
77. Gonzalo J, Taamouti A. The reaction of stock market returns to anticipated unemployment. 2011.
78. Naughton B. *The Chinese economy: Transitions and growth*. MIT press; 2007.
79. The Central People's Government of the People's Republic of China. The big event record of the Chinese Communist Party (Year 1976). In: China TCPsGotPsRo, editor. 2007.
80. Enders W. *Applied time series econometrics*. Hoboken: John Wiley and Sons ISBN X. 2004;52183919.
81. Andersson F. Identifying and modelling cycles and long waves in economic time series. *Structural Analysis and the Process of Economic Development*, Routledge. 2016:34–55.



82. Luo Y. The effect of the of the currency volume: the empirical evidence of the Chinese economy's soft-landing from 1993 to 1996. *Finance and Economics*. 1999; 25(5):18–24.
83. Ma H, Oxley L. *China's Energy Economy: Situation, Reforms, Behavior, and Energy Intensity*; Springer Science & Business Media; 2012.
84. Squalli J. Electricity consumption and economic growth: bounds and causality analyses of OPEC members. *Energy Economics*. 2007; 29(6):1192–205.
85. National Development and Reform Commission of China. *China Medium and Long Term Energy Conservation Plan 2005* [July 1, 2016]. <http://www.gdjn.org/jieneng/ninfo.asp?id=8>.
86. Qi T, Winchester N, Karplus VJ, Zhang X. Will economic restructuring in China reduce trade-embodied CO<sub>2</sub> emissions? *Energy Economics*. 2014; 42:204–12.
87. Brandt L, Tombe T, Zhu X. Factor market distortions across time, space and sectors in China. *Review of Economic Dynamics*. 2013; 16(1):39–58.
88. Huang X, Li P, Lotspeich R. Economic growth and multi-tasking by state-owned enterprises: An analytic framework and empirical study based on Chinese provincial data. *Economic Systems*. 2010; 34(2):160–77.
89. Economist T. Perverse advantage-A new book lays out the scale of China's industrial subsidies. *The Economist*. 2013.
90. Haley UC, Haley GT. *Subsidies to Chinese Industry: State Capitalism, Business Strategy, and Trade Policy*; Oxford University Press; 2013.
91. Wei C, Li C-Z. Resource misallocation in Chinese manufacturing enterprises: evidence from firm-level data. *Journal of Cleaner Production*. 2016.
92. Yao H. The characteristics analysis of China's service industry based on the view of final demand. *Journal of Statistics and Decision*. 2013; 387.
93. International Monetary Fund. *IMF Calls for Global Reform of Energy Subsidies: Sees Major Gains for Economic Growth and the Environment 2013*. <https://www.imf.org/external/np/sec/pr/2013/pr1393.htm>.
94. Phoenix finance and Economics. Our country is going to set time table for removing fossil energy subsidies(In Chinese: 我国取消化石能源补贴将设时间表) 2016 [July 1, 2016]. [http://finance.ifeng.com/a/20160421/14337214\\_0.shtml](http://finance.ifeng.com/a/20160421/14337214_0.shtml).
95. KPMG China. *Infrastructure in China Sustaining quality growth 2013* [July 1, 2016]. <https://www.kpmg.com/CN/en/IssuesAndInsights/ArticlesPublications/documents/Infrastructure-in-China-201302.pdf>.
96. Zhao X, Lyon TP, Song C. Lurching towards markets for power: China's electricity policy 1985–2007. *Applied Energy*. 2012; 94:148–55.
97. KPMG China. *China's 12th Five-Year Plan: Energy 2011*. <http://www.kpmg.com/cn/en/IssuesAndInsights/ArticlesPublications/Documents/China-12th-Five-Year-Plan-Energy-201104.pdf>.
98. The State Council of China. *Strategic Action Plan for Energy Development (2014–2020) 2014* [cited July 1, 2015]. [http://www.gov.cn/zhengce/content/2014-11/19/content\\_9222.htm](http://www.gov.cn/zhengce/content/2014-11/19/content_9222.htm).
99. Zhang S, Andrews-Speed P, Zhao X, He Y. Interactions between renewable energy policy and renewable energy industrial policy: A critical analysis of China's policy approach to renewable energies. *Energy Policy*. 2013; 62:342–53.
100. Hong L, Zhou N, Fridley D, Raczkowski C. Assessment of China's renewable energy contribution during the 12th Five Year Plan. *Energy Policy*. 2013; 62:1533–43.
